# Supplementary material
Source: PubMed Central journal article supplement (PMC4410449)
Supplement: Supp_Table1.pdf [file Supp_Table1.pdf]

## Supplementary Data

SUPPLEMENTARY TABLE S1. ANTHOCYANIN DETERMINATION OF MAQUI, CALAFATE, AND BLUEBERRY EXTRACTS BY LC-MS

| <i>RT (min)</i> | <i>Compound</i>                                                                                                         | <i>Molecular ion (m/z)</i> | <i>Fragment ions (m/z)</i> |                   |                  |
|-----------------|-------------------------------------------------------------------------------------------------------------------------|----------------------------|----------------------------|-------------------|------------------|
|                 |                                                                                                                         |                            | <i>Maqui</i>               | <i>Calafate</i>   | <i>Blueberry</i> |
| 3.6             | Cyanidin-3,5-diglucoside or cyanidin-3-soforoside                                                                       | 611.4                      | 449.0 286.9 593.1          | 449.0 287.0       |                  |
| 4.2             | Delphinidin-3-sambubioside-5-glucoside                                                                                  | 759.5                      | 465.0 597.0 303.0          |                   |                  |
| 4.4             | Petunidin-3- <i>O</i> -galactoside-5- <i>O</i> -glucoside<br>or petunidin-3- <i>O</i> -glucoside-5- <i>O</i> -glucoside | 641.4                      |                            | 479.0 317.1       |                  |
| 4.7             | Delphinidin-3,5- <i>O</i> -diglucoside                                                                                  | 627.4                      | 465.0 303.0                |                   |                  |
| 6.0             | Cyanidin-3-sambubioside-5-glucoside                                                                                     | 743.6                      | 449.0 581.0 287.0          |                   |                  |
| 6.2             | Delphinidin-3-glucoside or galactoside.                                                                                 | 465.3                      | 303.0                      | 303.0             | 303.0            |
| 6.3             | Delphinidin-3-sambubioside                                                                                              | 597.4                      | 303.0                      |                   |                  |
| 8.0             | Delphinidin-3-arabinoside                                                                                               | 435.4                      |                            |                   | 303.0            |
| 8.4             | Cyanidin-3-sambubioside                                                                                                 | 581.4                      | 287.0                      |                   |                  |
| 8.7             | Cyanidin-3-glucoside or cyanidin-3-galactoside                                                                          | 449.3                      | 287.0                      | 287.0             |                  |
| 9.4             | Cyanidin-3-rutinoside                                                                                                   | 595.4                      |                            | 287.0 449.0 578.2 |                  |
| 9.7             | Cyanidin-3-arabinoside or cyanidin-3-xiloside                                                                           | 419.3                      |                            |                   | 287.0            |
| 9.8             | Petunidin-3-galactoside or petunidin-3-glucoside                                                                        | 479.1                      |                            | 317.1             | 317.1            |
| 10.6            | Petunidin-3-rutinoside                                                                                                  | 625.4                      |                            | 317.1 479.0       |                  |
| 11.1            | Petunidin-3-arabinoside                                                                                                 | 449.2                      |                            |                   | 317.1            |
| 11.9            | Peonidin-3-galactoside or peonidin-3-glucoside                                                                          | 463.4                      |                            | 301.0             |                  |
| 12.9            | Malvidin-3-galactoside or malvidin-3-glucoside                                                                          | 493.2                      |                            | 331.1             | 331.1            |
| 13.0            | Peonidin-3-arabinoside                                                                                                  | 433.4                      |                            |                   | 301.0            |
| 13.5            | Malvidin-3-rutinoside                                                                                                   | 639.4                      |                            | 331.1 493.0       |                  |
| 14.1            | Malvidin-3-arabinoside                                                                                                  | 463.3                      |                            |                   | 331.1            |

LC-MS, liquid chromatography coupled to mass spectrometry; RT, retention time.
